# Supplementary material
Source: PubMed Central journal article supplement (PMC5593129)

# S. Figure 1

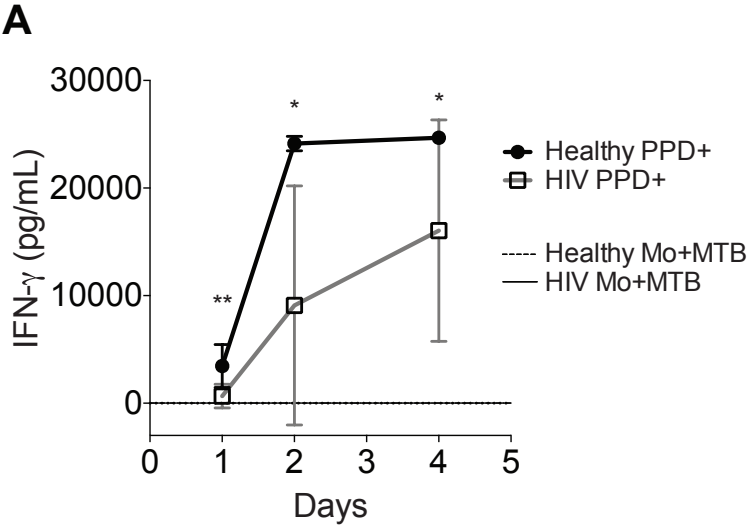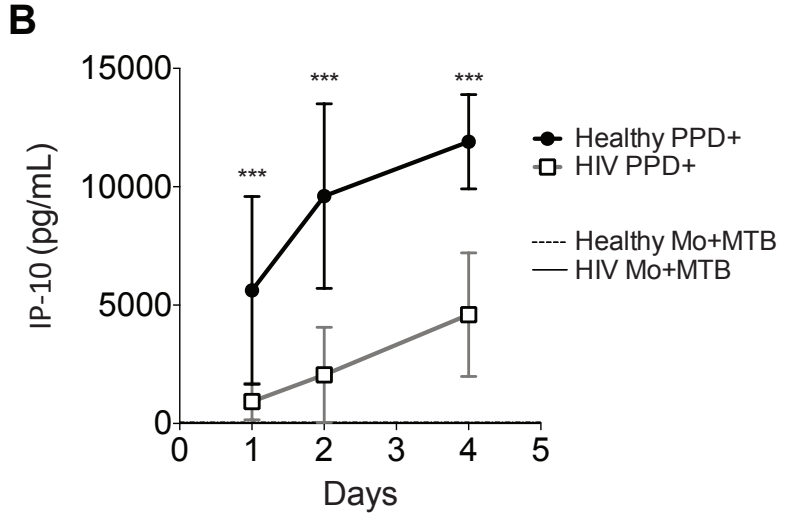

# S. Figure 2

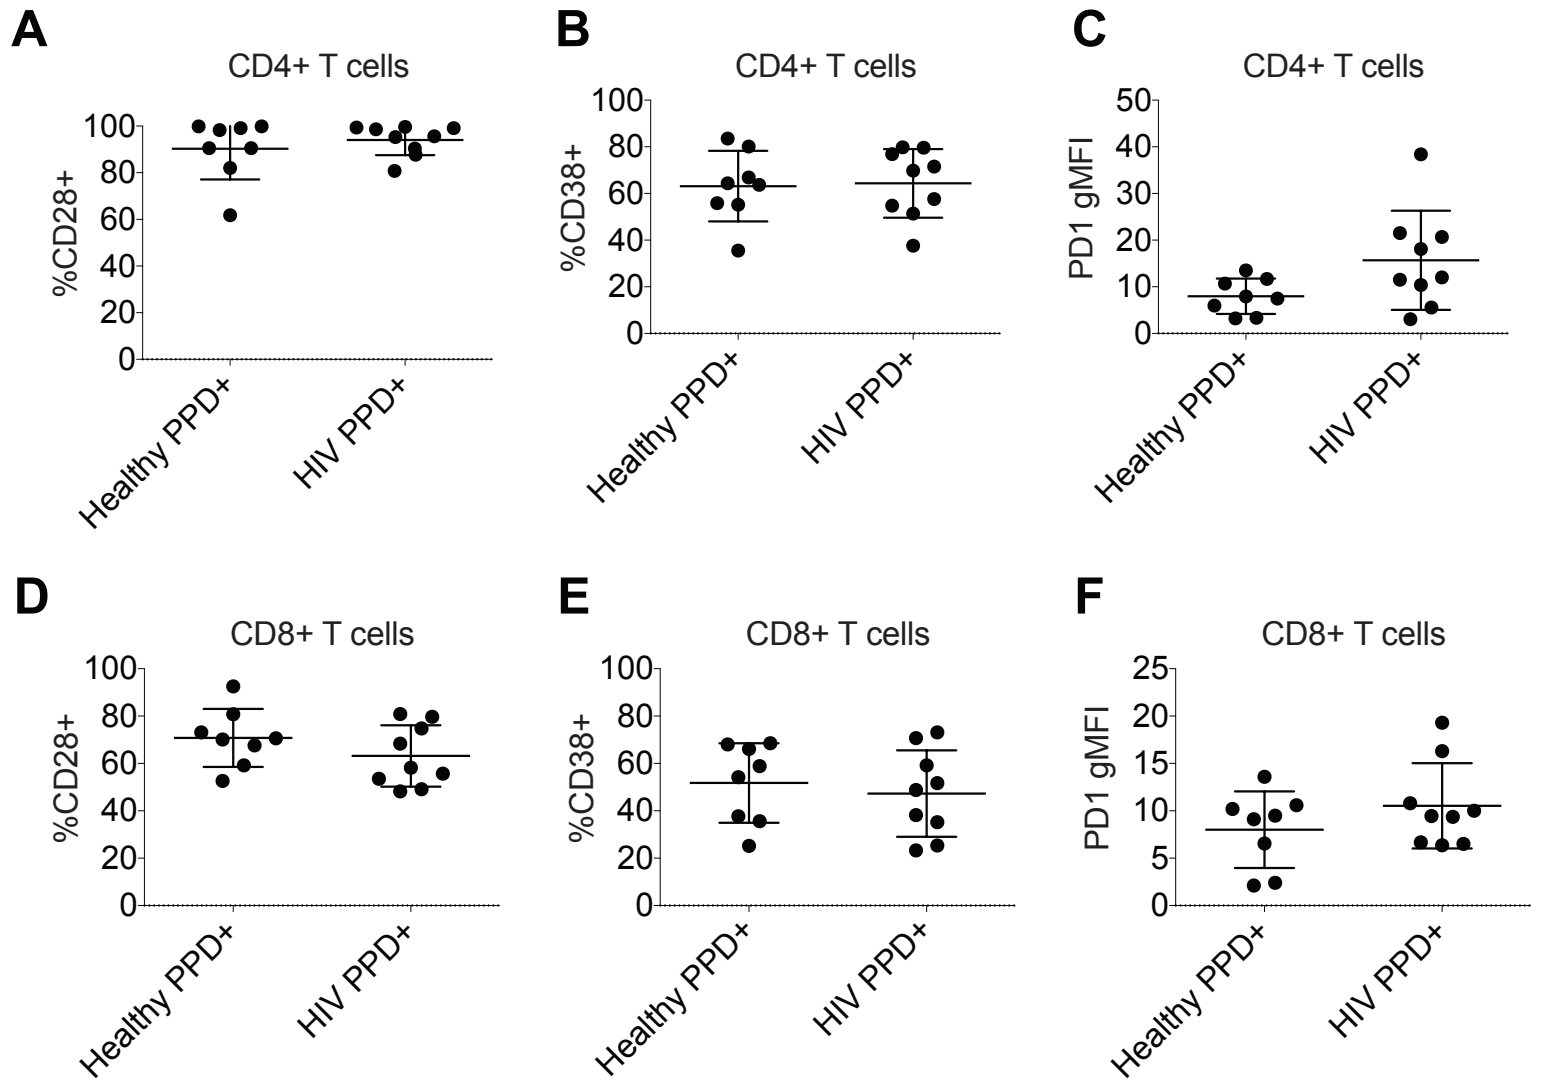

# S. Figure 3

**A**

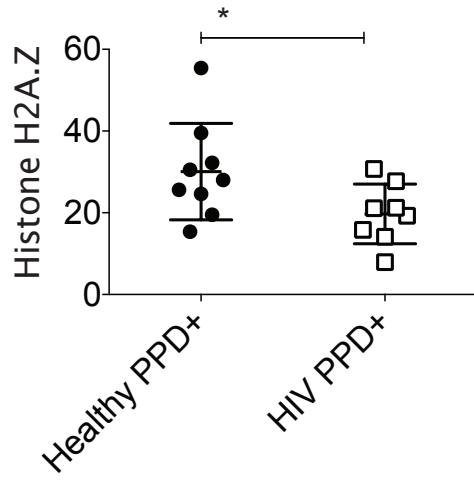

**B**

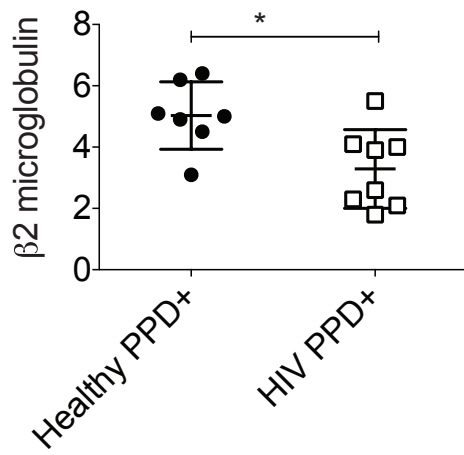

**C**

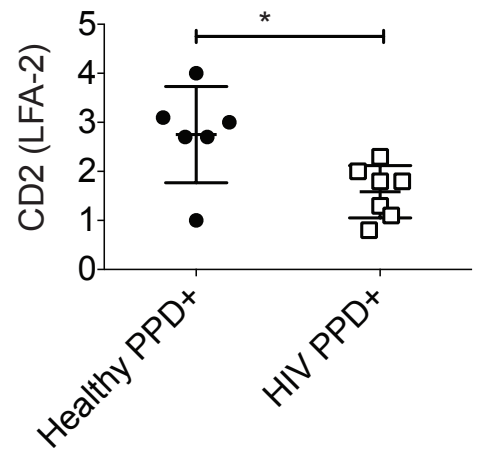

Supplement: NIHMS892968-supplement-3.pdf [file NIHMS892968-supplement-3.pdf]
